# Supplementary material
Source: HighWire-hosted journal article supplement (https://jnm.snmjournals.org/highwire/filestream/94756/field_highwire_adjunct_files/0/152918_Supplemental_Data.pdf)
Supplement: 152918_Supplemental_Data.pdf [file 152918_Supplemental_Data.pdf]

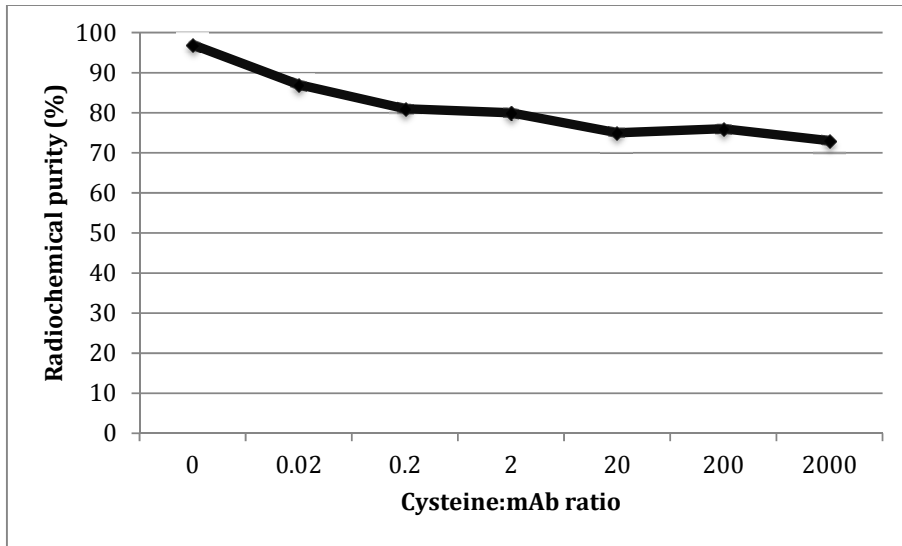

**Supplemental Figure 1.** Cysteine challenge assay of radiolabelled  $^{99m}\text{Tc}$ -anti-CD56 mAb assessed by ITLC-SG at an increasing ratio between cysteine and mAb.

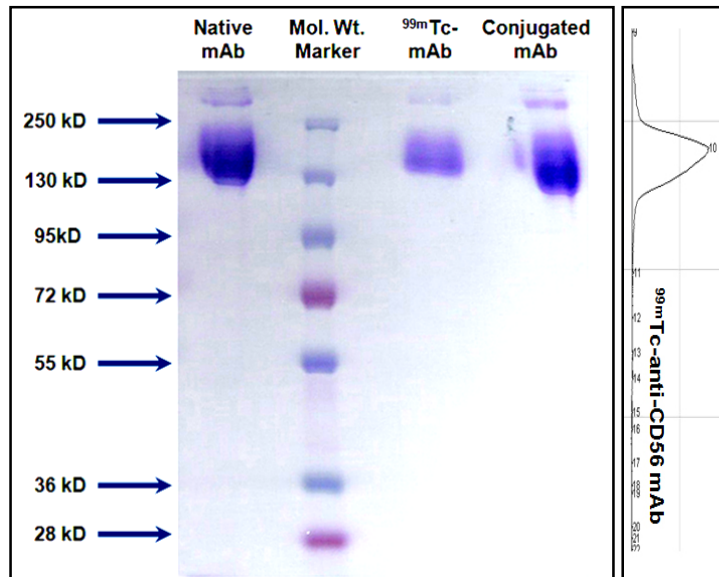

**Supplemental Figure 2.** SDS-PAGE analysis of native, conjugated and radiolabelled  $^{99m}\text{Tc}$ -anti-CD56 mAb in non-reducing conditions. The gel was also analyzed with a radioscaner to evaluate the radioactivity associated with each band.

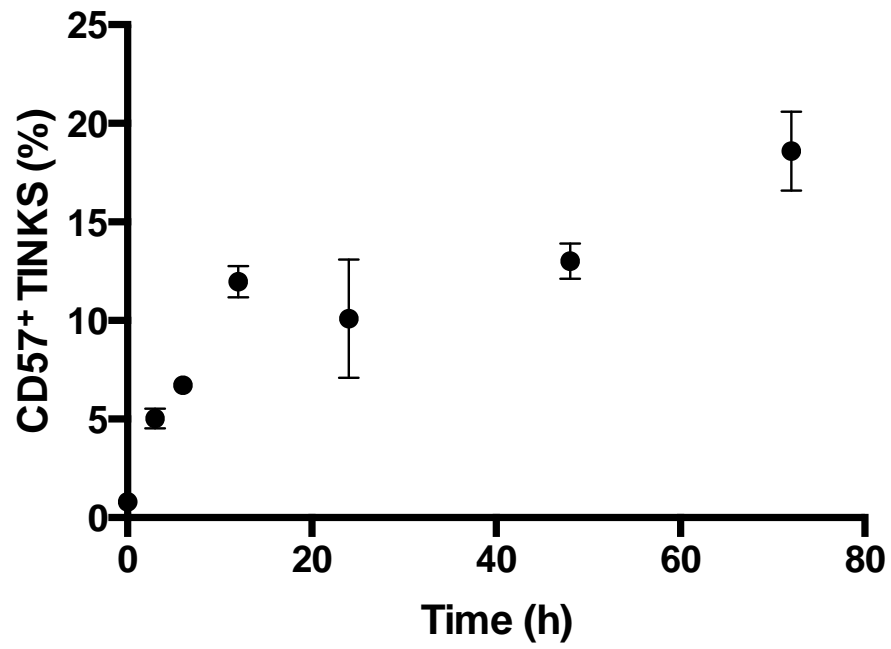

**Supplemental Figure 3.** Kinetics of TINKs revealed by immunohistochemistry staining for CD57. Data are expressed as % of CD57<sup>+</sup> cells over time.
